# Supplementary material for: TET1 inhibits gastric cancer growth and metastasis by PTEN demethylation and re-expression
Source: PubMed Central journal article supplement (PMC5058759; doi:10.18632/oncotarget.8900), 2016-04-21
Supplement: oncotarget-07-31322-s001.pdf [file oncotarget-07-31322-s001.pdf]

**SUPPLEMENTARY FIGURES**

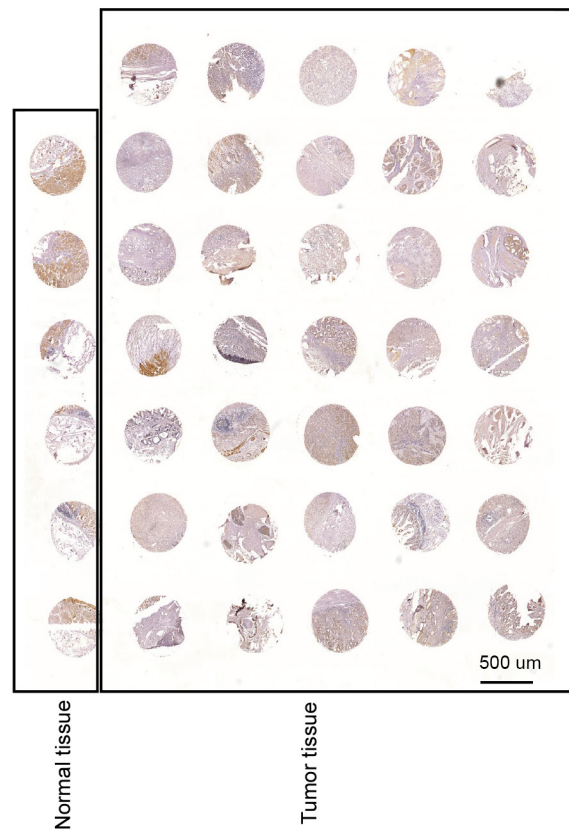

**Supplementary Figure S1: IHC analysis of tumor tissues and adjacent non-tumor tissues.**

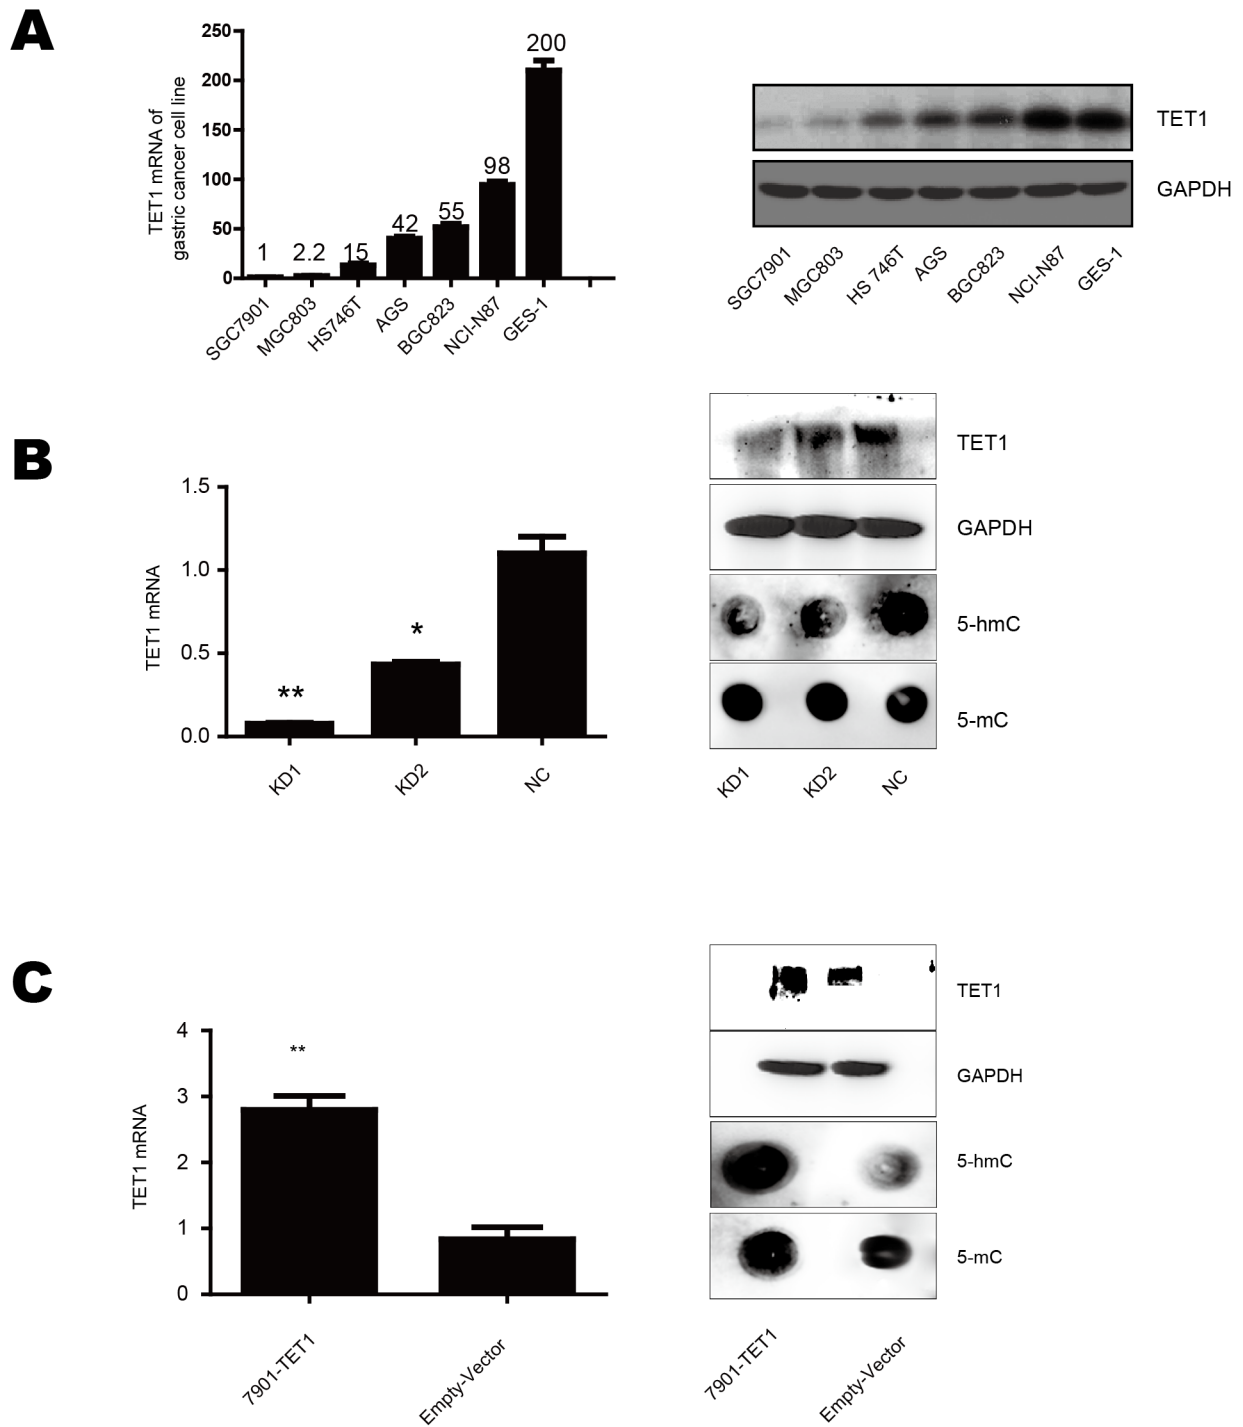

**Supplementary Figure S2:** A. TET1 level in gastric cancer cell lines. B & C. TET1 was knocked down and over-expressed in NCI-N87 and SGC-7901 cells.

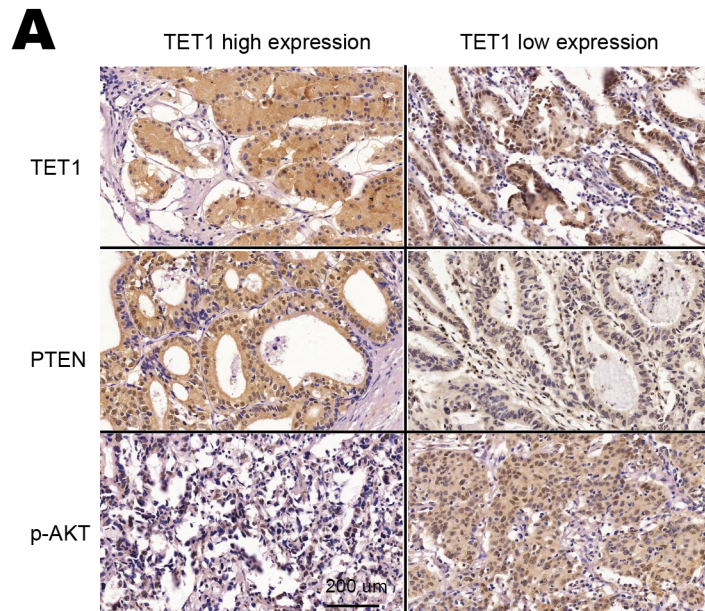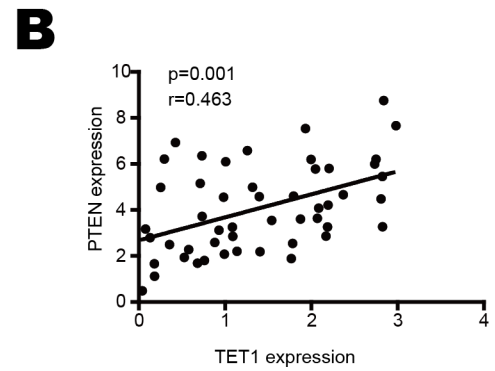

**C**

|               | Difference       |         | correlation |         |
|---------------|------------------|---------|-------------|---------|
|               | Chi-square value | p value | R value     | p value |
| TET1 vs PTEN  | 0.003            | 0.238   | 0.59        | 0.001*  |
| TET1 vs p-AKT | 6.983            | 0.008   | -0.295      | 0.008*  |

**Supplementary Figure S3: The correlation between TET1, PTEN and p-AKT in specimens.** A. IHC analysis showed positive correlation between TET1 and PTEN, while negative correlation existed between TET1 and p-AKT. B & C. Spearman's correlation analysis showed positive correlation between TET1 and PTEN, while negative correlation between TET1 and p-AKT.
